# Supplementary material
Source: HighWire-hosted journal article supplement (http://jpet.aspetjournals.org/highwire/filestream/146824/field_highwire_adjunct_files/0/263145SupplTable.pdf)
Supplement: 263145SupplTable.pdf [file 263145SupplTable.pdf]

## Leukotriene B4 receptor type 2 (BLT2) accelerates the healing of intestinal lesions by promoting epithelial cell proliferation

Yui Matsumoto, Yukiko Matsuya, Kano Nagai, Kikuko Amagase, Kazuko Saeki, Kenjiro, Matsumoto, Takehiko Yokomizo, and Shinichi Kato

Journal of Pharmacology and Experimental Therapeutics

**Supplementary Table 1. Expression of BLT2 mRNA in the intestine of WT and villin-BLT2-Tg mice**

| GROUP          | BLT2 mRNA expression (/ $\beta$ -actin $\times 10^4$ ) |         |                |              |
|----------------|--------------------------------------------------------|---------|----------------|--------------|
|                | Jejunum                                                | Ileum   | Proximal colon | Distal colon |
| WT             | 14.1                                                   | 4.2     | 1.0            | 1.2          |
| Villin-BLT2-Tg | 4,569.2                                                | 2,754.7 | 1,496.8        | 1,134.1      |

The animals were sacrificed and their intestines were excised. Total RNA was extracted from the jejunal, ileal, proximal, and distal colon tissues with TRIzol RNA isolation reagent (Thermo Fisher Scientific Inc., Waltham, MA, USA), reverse-transcribed with a QuantiTect reverse transcription kit (Qiagen, Germantown, MD, USA), and analyzed by quantitative PCR on a LightCycler 96 (Roche, Upper Bavaria, Germany) with FastStart Essential DNA Green Master (Roche, Upper Bavaria, Germany). The specific primer sets for BLT2 and  $\beta$ -actin were F: 5'-ACAGCCTTGGCTTTCTTCAG-3' and R: 5'-TGCCCCATTACTTTCAGCTT-3', and F: 5'-CATCCGTAAAGACCTCTATGCCAAC-3' and R: 5'-ATGGAGCCACCGATCCACA-3', respectively. The mRNA expression level of BLT2 was standardized to that of  $\beta$ -actin.
